# Supplementary material for: Approach-Induced Biases in Human Information Sampling
Source: PubMed Central journal article supplement (PMC5104460; doi:10.1371/journal.pbio.2000638), 2016-11-10

# Task Stage 1: sample, or guess? (ADD trials)

**A** Dynamic programming model (identical for ADD BIG/ADD SMALL and AA/AB trials)

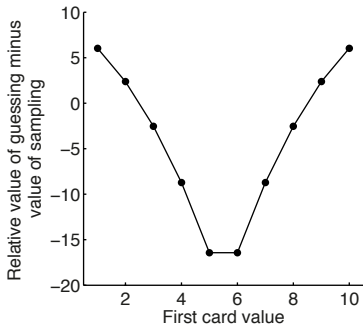

**B(i)** Behavior: AA trials

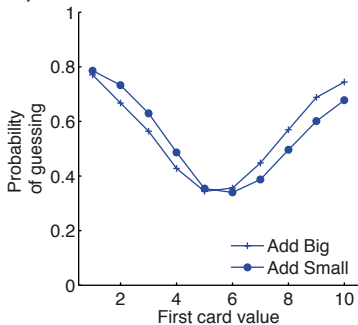

**C** Framing effect: ADD BIG minus ADD SMALL

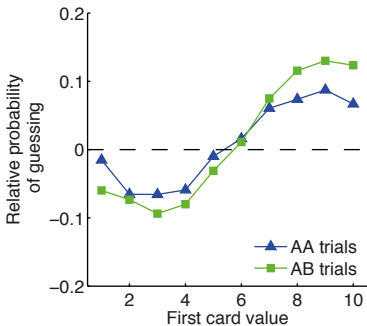

**B(ii)** Behavior: AB trials

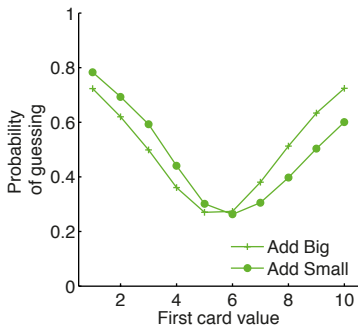

Supplement: pbio.2000638.s002.pdf [file pbio.2000638.s002.pdf]
