# Supplementary material for: Approach-Induced Biases in Human Information Sampling
Source: PubMed Central journal article supplement (PMC5104460; doi:10.1371/journal.pbio.2000638), 2016-11-10

# Task Stage 1: sample, or guess? (SINGLE CARD trials)

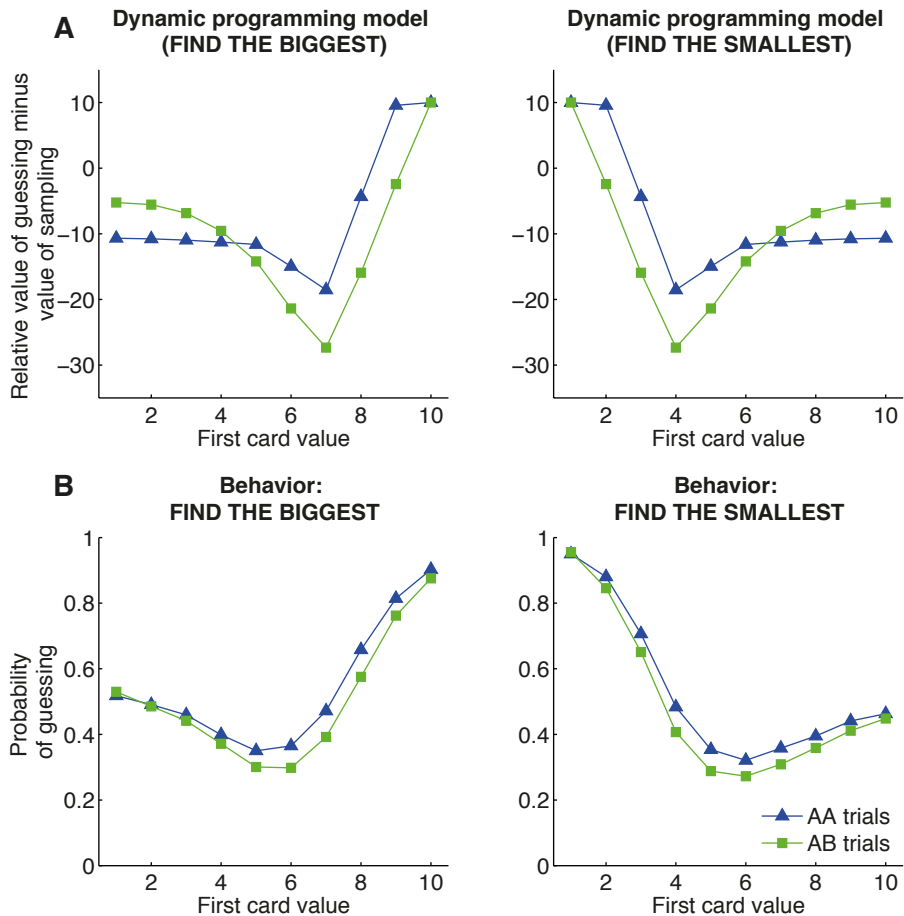

Supplement: pbio.2000638.s003.pdf [file pbio.2000638.s003.pdf]
