# Supplementary material for: Approach-Induced Biases in Human Information Sampling
Source: PubMed Central journal article supplement (PMC5104460; doi:10.1371/journal.pbio.2000638), 2016-11-10

# Making guess, after task stage 1: which row chosen? (MULTIPLY trials)

**A** Dynamic programming model (identical for AA and AB TRIALS)

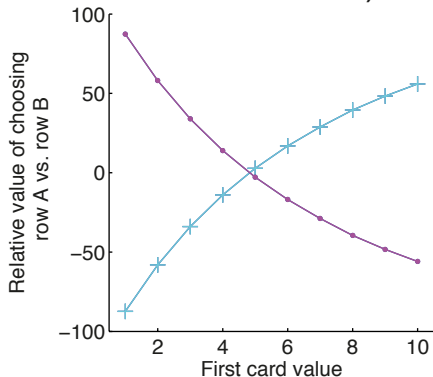

**B(i)** Behavior: MULTIPLY BIG

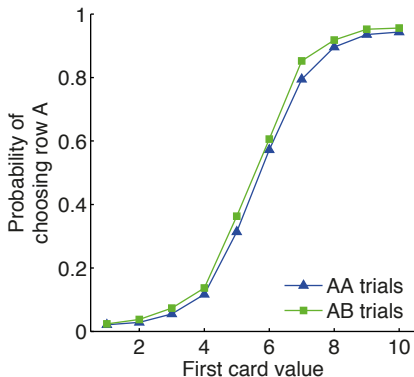

**C** Rejecting unsampled options: AA minus AB trials

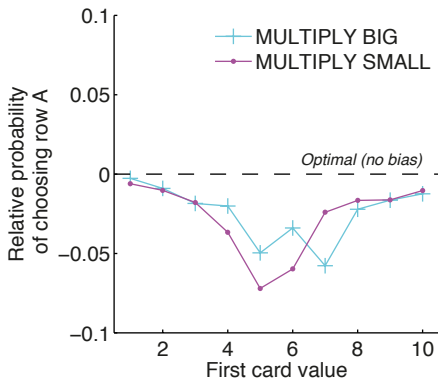

**B(ii)** Behavior: MULTIPLY SMALL

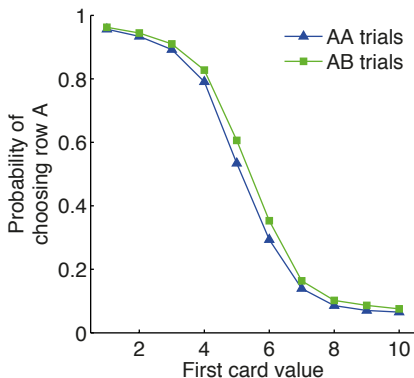

Supplement: pbio.2000638.s004.pdf [file pbio.2000638.s004.pdf]
