# Supplementary material for: Approach-Induced Biases in Human Information Sampling
Source: PubMed Central journal article supplement (PMC5104460; doi:10.1371/journal.pbio.2000638), 2016-11-10

# Making guess, after task stage 1: which row chosen? (SINGLE CARD trials)

**A** Dynamic programming model  
(identical for AA and AB trials)

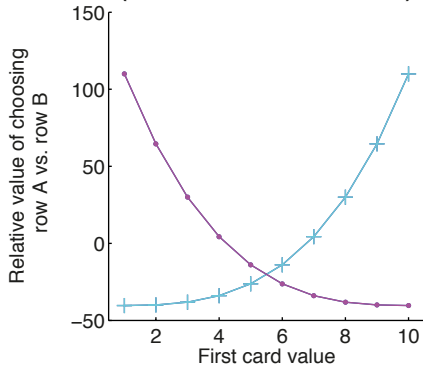

**B(i)** Behavior:  
FIND BIGGEST (cyan)

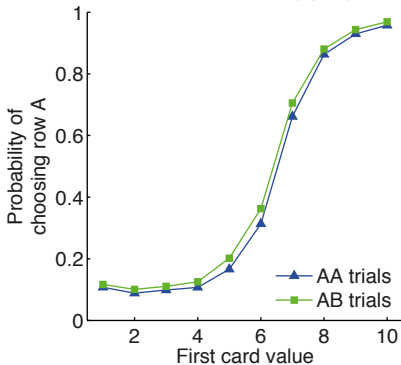

**C** Rejecting unsampled options:  
AA minus AB trials

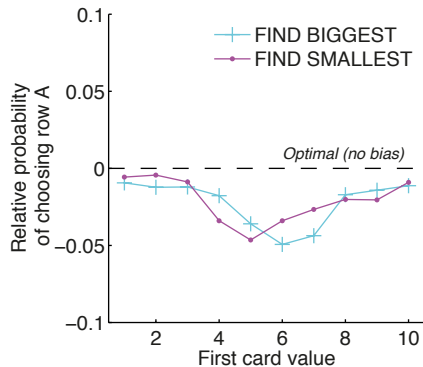

**B(ii)** Behavior:  
FIND SMALLEST (magenta)

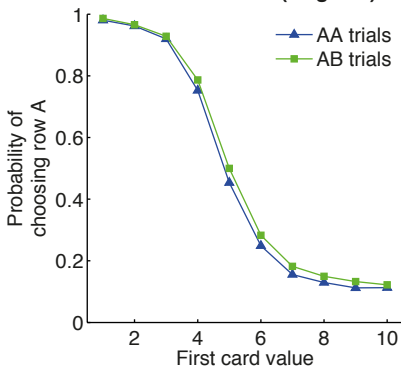

Supplement: pbio.2000638.s005.pdf [file pbio.2000638.s005.pdf]
