# Supplementary material for: Approach-Induced Biases in Human Information Sampling
Source: PubMed Central journal article supplement (PMC5104460; doi:10.1371/journal.pbio.2000638), 2016-11-10

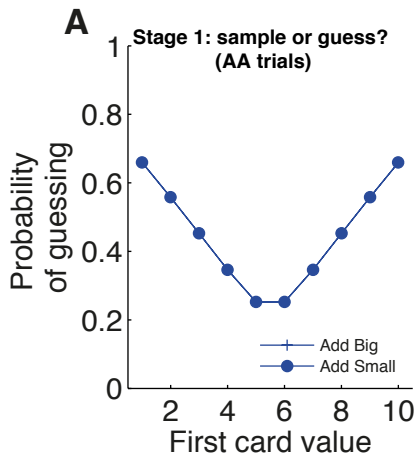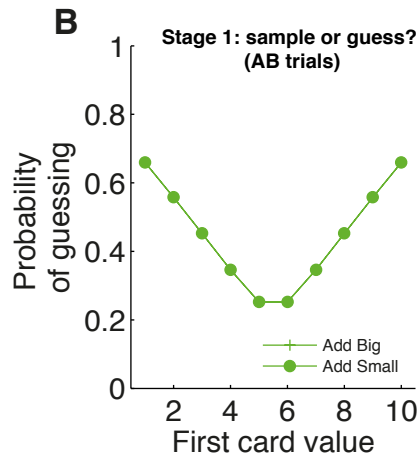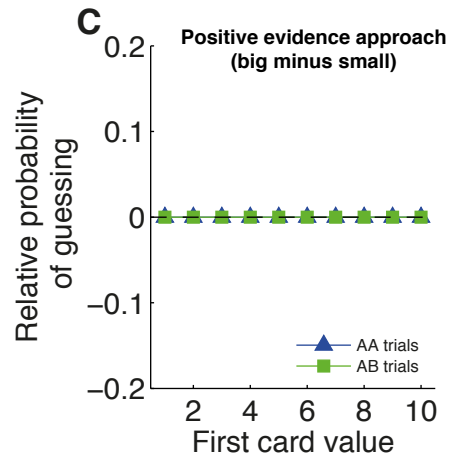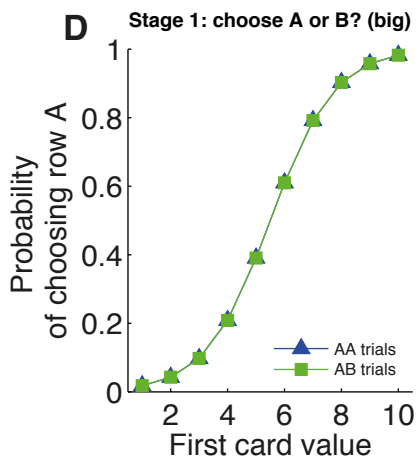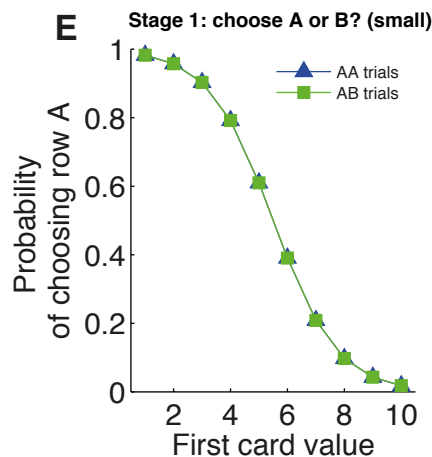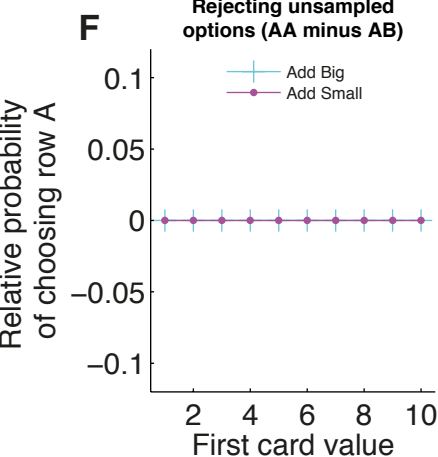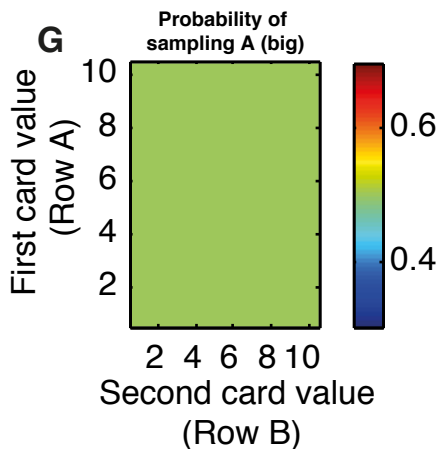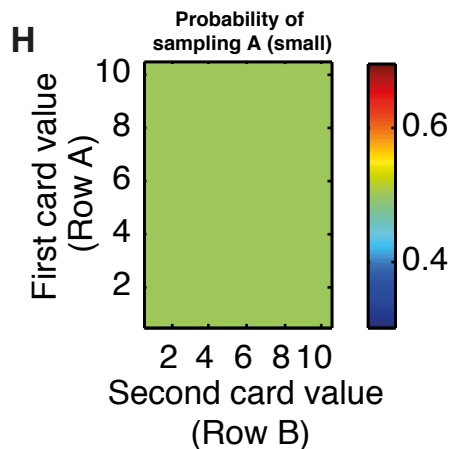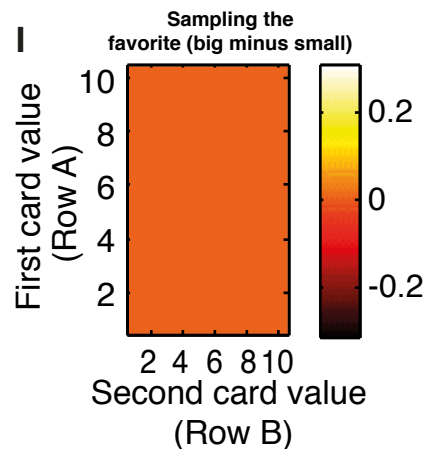

Supplement: pbio.2000638.s009.pdf [file pbio.2000638.s009.pdf]
